# Supplementary material for: Large-scale production of two-dimensional nanosheets
Source: Royal Society of Chemistry journal article supplement (doi:10.1039/c2jm30587a), 2012-01-01
Supplement: c2jm30587a.pdf [file c2jm30587a.pdf]

## Supporting Information

### Large-scale Production of Two-Dimensional Nanosheets

Yagang Yao,<sup>a</sup> Ziyin Lin,<sup>a</sup> Zhuo Li,<sup>a</sup> Xiaojuan Song,<sup>b</sup> Kyoung-Sik Moon,<sup>a</sup> and Ching-ping Wong<sup>\*a,c</sup>

<sup>a</sup> School of Materials Science and Engineering, Georgia Institute of Technology, 771 Ferst Drive NW, Atlanta, GA 30332, USA

<sup>b</sup> Electro-Optical System Lab, Georgia Technology Research Institute, Georgia Institute of Technology, 925 Dalney Street NW, Atlanta, GA 30332, USA

<sup>c</sup> Department of Electronic Engineering, Faculty of Engineering, The Chinese University of Hong Kong, ShaTin, Hong Kong

**\*Corresponding author: Tel: (+1) 404 894 8391; Fax: (+1) 404 894 9140**

**E-mail: [cp.wong@mse.gatech.edu](mailto:cp.wong@mse.gatech.edu)**

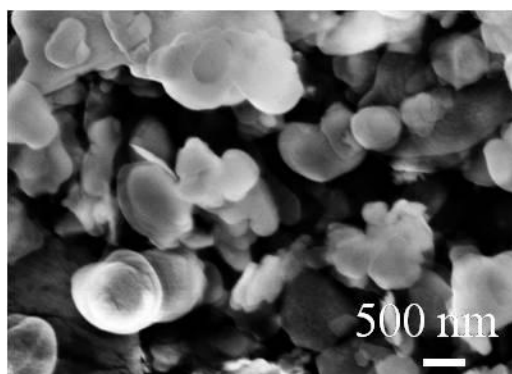

Fig. S1 Typical SEM image of the initial h-BN particles.

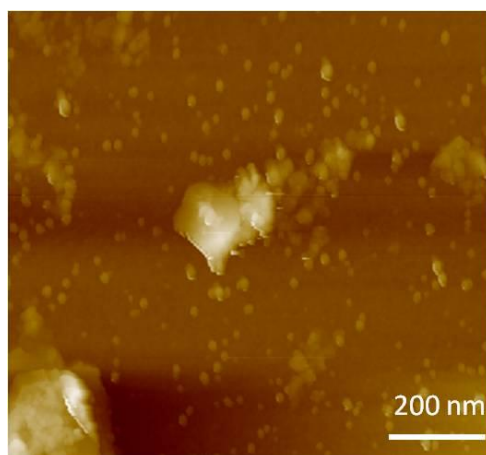

Fig. S2. AFM of exfoliated h-BN by combined ball milling and sonication. The size of BN nanosheets is from 10 nm to 500 nm and the thickness is from 1.2 nm to 8 nm.

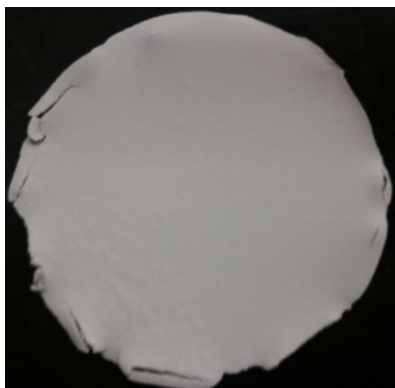

Fig. S3 A typical photograph of a thin h-BN film by vacuum filtration.

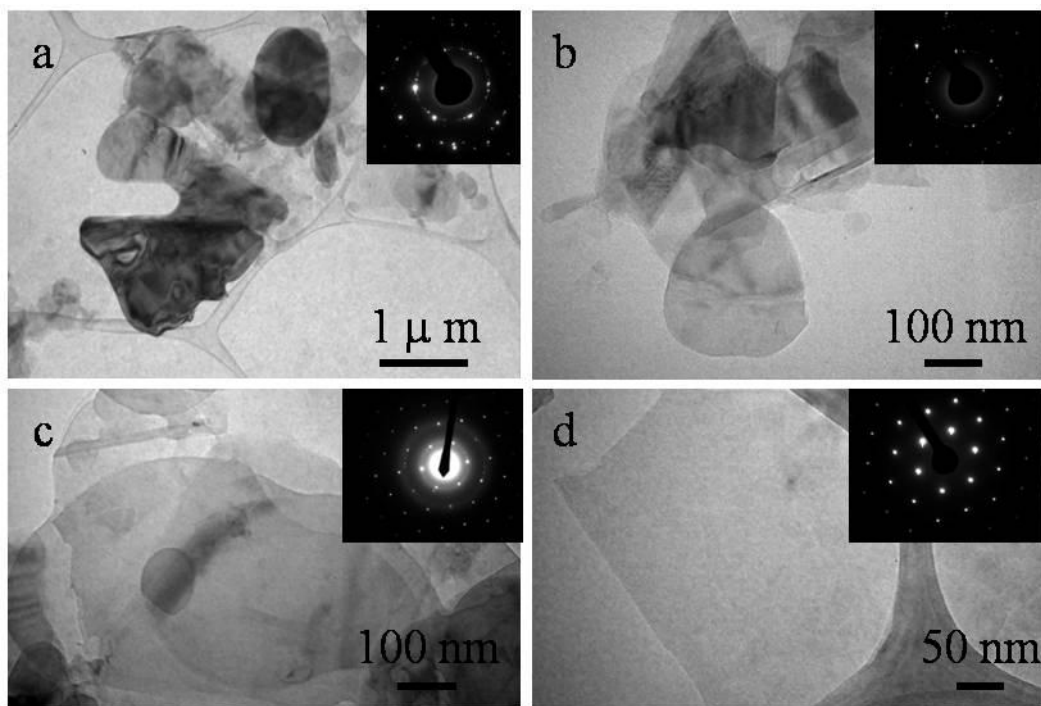

Fig. S4 Typical TEM images of exfoliated h-BN nanosheets by low-energy ball milling only for various durations in SDS/water solution and their corresponding SAED patterns. (a) 1 hr, (b) 3 hrs, (c) 6 hrs, (d) 12 hrs. We hardly saw the difference between the samples by 12 hrs milling and 24 hrs milling (data not shown here). According to this, the most efficient exfoliation happens in the first 12 hrs of low-energy ball milling.

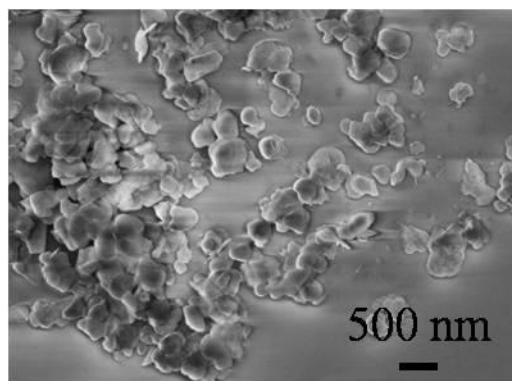

Fig. S5 Typical SEM image of h-BN nanosheets exfoliated by 12 hrs ball milling. Notably, not only the h-BN particle thicknesses are reduced, but also the lateral sizes of the h-BN flakes become smaller, compared to pristine particles (Figure s1a), which is consistent with the TEM results.

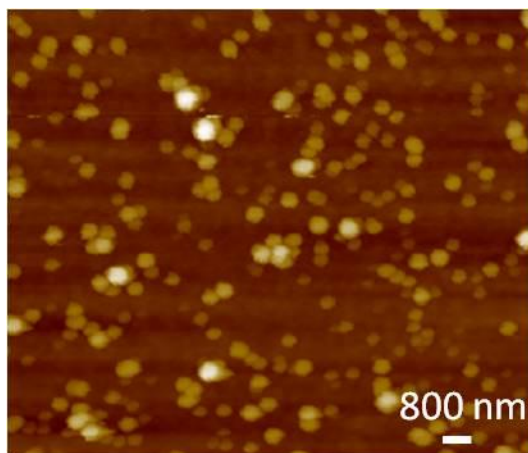

Fig. S6 Typical AFM of MoS<sub>2</sub> nanosheets exfoliated by combined ball milling and sonication. The size of MoS<sub>2</sub> nanosheets is from 50 nm to 700 nm and the thickness is from 1.2 nm to 8 nm.
